# Supplementary material for: OX40L-Armed Oncolytic Virus Boosts T-cell Response and Remodels Tumor Microenvironment for Pancreatic Cancer Treatment
Source: PubMed Central journal article supplement (PMC10405835; doi:10.7150/thno.83495), 2023-07-09
Supplement: thnov13p4016s1.pdf [file thnov13p4016s1.pdf]

## **Supplementary Materials**

Supplementary Figure and Figure Legends

Supplementary Table

## Supplementary Figures and Figure Legends

### Figure S1

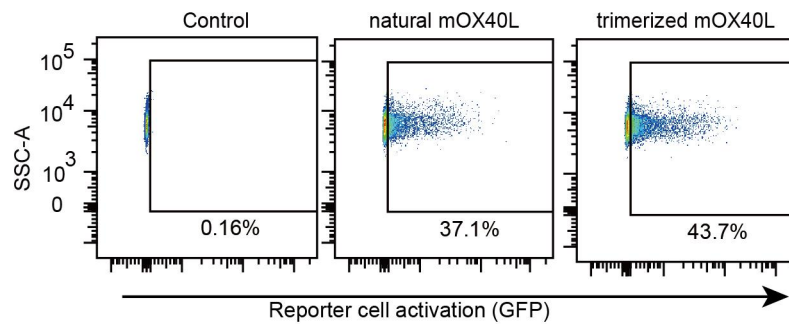

**Figure S1. Agonistic activity of the natural mOX40L and trimerized mOX40L.** HEK293FT cells were transfected with the whole natural mOX40L or trimerized membrane bound mOX40L and cocultured with Jurkat-NF- $\kappa$ B-GFP-OX40 reporter cells, which express GFP upon activation of the OX40-OX40L signaling pathway. The GFP expression of the reporter cells was analyzed by flow cytometry.

### Figure S2

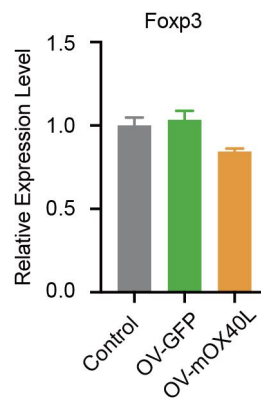

**Figure S2. Effect of OV-mOX40L on Foxp3 expression of Tregs.** Tregs were cocultured with OV-infected KPC cells in 48-well plate for 24 hours. Foxp3 expression was detected by quantitative real-time PCR.

**Figure S3**

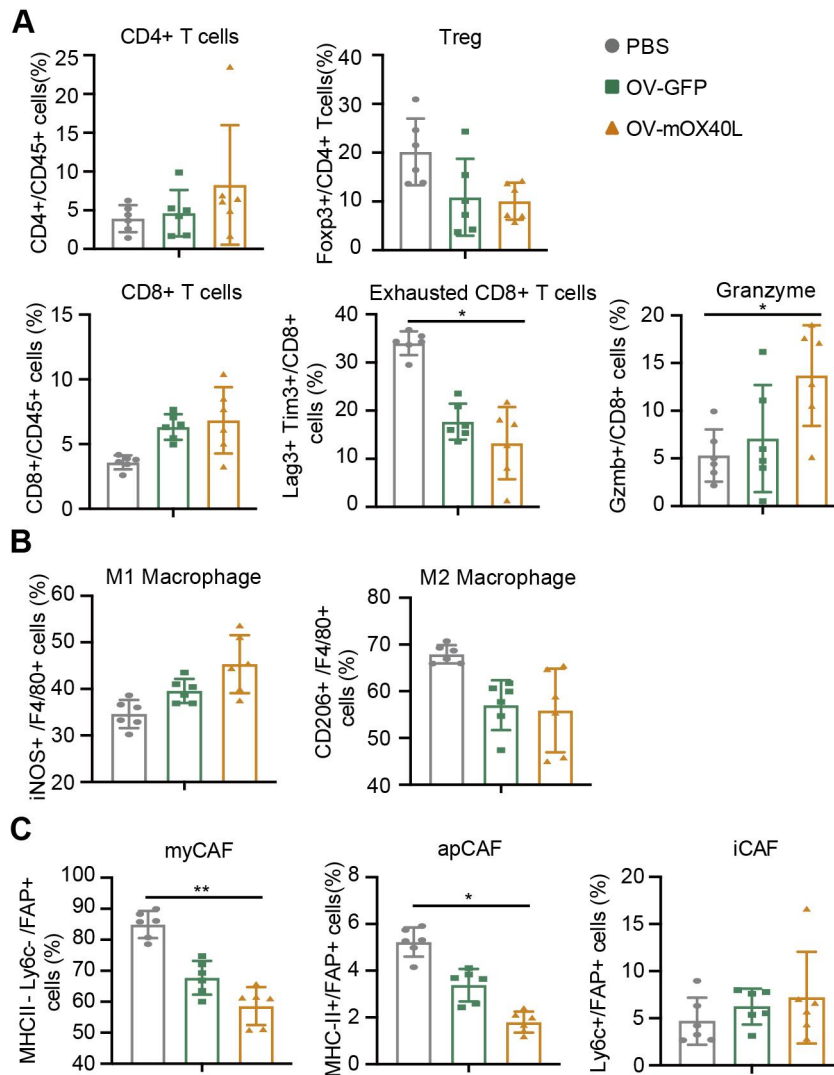

**Figure S3. Flow cytometry analysis of tumor-infiltrating immune cells and fibroblasts after the treatment with oncolytic viruses.** Mice were subcutaneously implanted with KPC cells and treated with oncolytic viruses or PBS. Tumor tissues were collected 3 days after the last treatment. A-C) The single-cell suspension was prepared from tumor, stained with the fluorescent antibodies and subjected to flow cytometry analysis for the profiling of T cells (A), macrophages (B) and fibroblasts (C). Statistical significance was determined by ANOVA tests and multiple comparisons. Figure S3 was a repeated experiment for Figure 3.

**Figure S4**

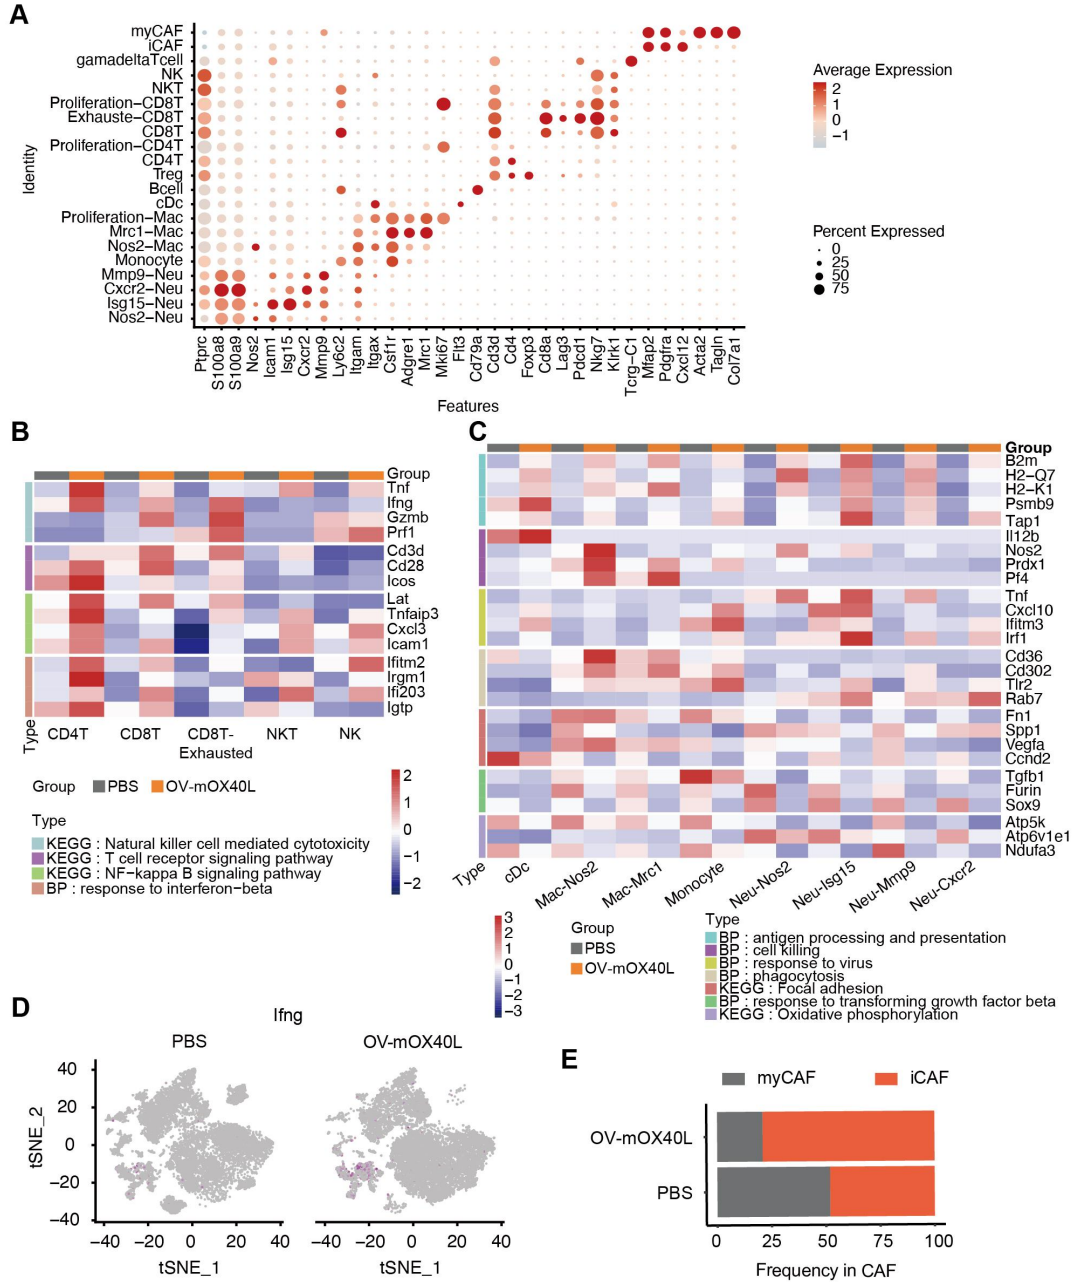

**Figure S4. Analysis of intratumoral immune cells by scRNA-seq. A)** Bubble plots showed the expression of cell markers in each cluster. **B)** Heatmap displayed the expression of the selected genes in each pathway of lymphocyte cluster. **C)** Heatmap displayed the expression of the selected genes in each pathway of neutrophil, macrophage and cDC cluster. **D)** The expression of IFN- $\gamma$  from PBS and OV-mOX40L group was shown by the t-SNE plot. **E)** The proportions of CAF clusters.

## Supplementary Table

**Table S1. List of anti-mouse antibodies for flow cytometry analysis**

| Cell marker     | Catalog number | Vendor    | Fluorescence          |
|-----------------|----------------|-----------|-----------------------|
| CD45            | 103107         | biolegend | FITC                  |
| CD4             | 100428         | biolegend | Pacific Blue™         |
| CD8a            | 100752         | biolegend | Brilliant Violet 510™ |
| CD366 (Tim-3)   | 134006         | biolegend | Alexa Fluor® 647      |
| CD223 (LAG-3)   | 125226         | biolegend | PE/Cyanine7           |
| CD279 (PD-1)    | 135228         | biolegend | PE/Dazzle™ 594        |
| Ki-67           | 151210         | biolegend | PE                    |
| IFN-γ           | 505846         | biolegend | PE/Dazzle™ 594        |
| FOXP3           | 320014         | biolegend | Alexa Fluor® 647      |
| Granzyme B      | 372208         | biolegend | PE                    |
| CD11b           | 101224         | biolegend | Pacific Blue™         |
| I-A/I-E (MHCII) | 107614         | biolegend | APC                   |
| F4/80           | 123149         | biolegend | Brilliant Violet 650™ |
| CD206 (MMR)     | 141732         | biolegend | PE/Dazzle™ 594        |
| Nos2 (iNOS)     | 696806         | biolegend | PE                    |
| Ly-6C           | 128033         | biolegend | Brilliant Violet 510™ |
| FAP             | bs-5758R-AF647 | Bioss     | Alexa Fluor® 647      |
